# Supplementary material
Source: Royal Society of Chemistry journal article supplement (doi:10.1039/d6gc01668e)
Supplement: d6gc01668e1.pdf [file d6gc01668e1.pdf]

## Supplementary Information

# **Low-Voltage Suspension Electrolysis Enables Redox Coupled Synergistic Leaching for Closed Loop Recycling of Mixed NCM-LFP Cathodes**

Kenan Zhong<sup>a</sup>, Fucheng Wang<sup>a</sup>, Wenke Liu<sup>a</sup>, Zhuo Ye<sup>a</sup>, Xueyang Hou<sup>a</sup>, Kai Yang<sup>a, \*</sup>,  
Zhao Fang<sup>a, b \*</sup>

<sup>a</sup> School of Metallurgical Engineering, Xi'an University of Architecture and  
Technology, Xi'an, 710055, China.

<sup>b</sup> Metallurgical Engineering Technology Research Center of Shaanxi Province, Xi'an,  
710055, China.

### **\*Corresponding Authors**

E-mail address: fangzhao@xauat.edu.cn (Z. Fang)

E-mail address: yangkaiyj@xauat.edu.cn (K. Yang)

Table S1 Elemental content analysis of NCM and LFP black powder.

| Materials | element |       |       |       |       |      |
|-----------|---------|-------|-------|-------|-------|------|
|           | Li      | Ni    | Co    | Mn    | Fe    | C    |
| LFP       | 3.12    | \     | \     | \     | 34.85 | 3.69 |
| NCM       | 6.23    | 38.24 | 13.28 | 20.64 | \     | 0.05 |

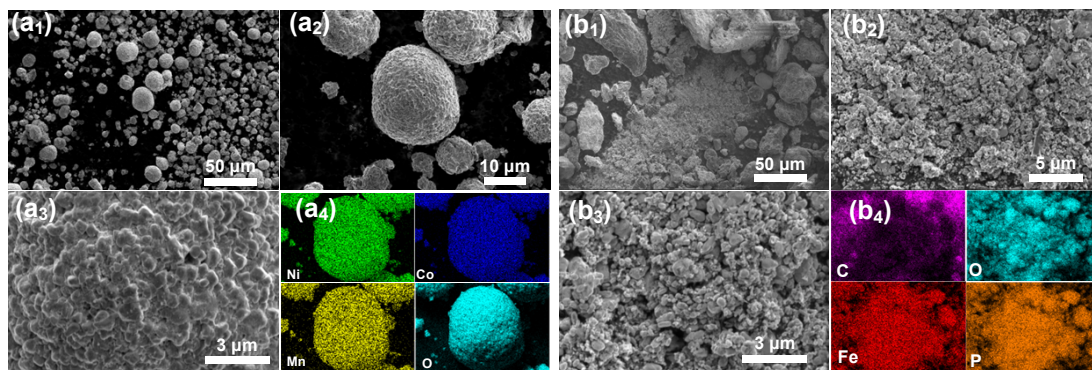

Figure S1 (a) SEM and EDS spectra of NCM and (b) LFP black powder.

Table S2 Calculation Results of EDS elements for NCM and LFP black powder.

| material | element | Wt %  |
|----------|---------|-------|
| NCM      | O       | 27.54 |
|          | Mn      | 18.91 |
|          | Co      | 14.53 |
|          | Ni      | 39.01 |
| LFP      | C       | 31.83 |
|          | O       | 35.27 |
|          | P       | 10.72 |
|          | Fe      | 22.19 |

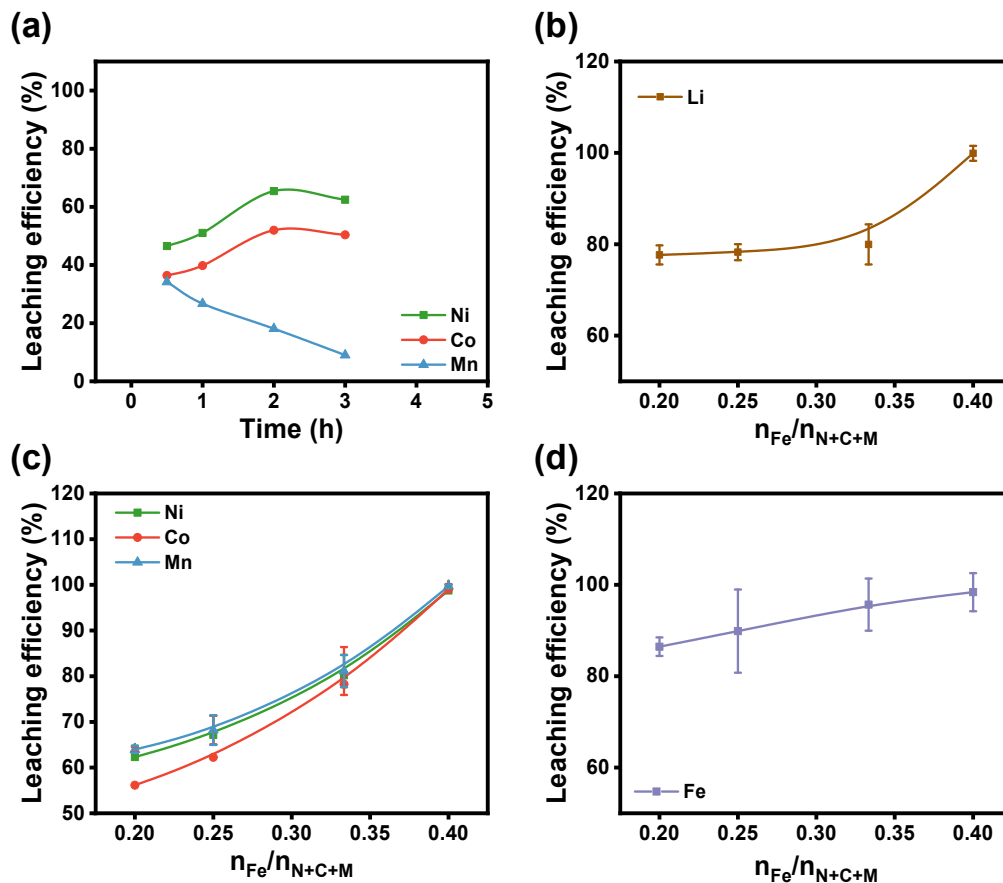

Figure S2 (a) The variation of the leaching efficiency of Ni, Co and Mn with time when  $n_{Fe}/n_{(Ni+Co+Mn)} = 0$ , (b-d) The effect of different black powder ratios on the leaching efficiency of Li, Ni, Co, Mn and Fe under the conditions of a solid-liquid ratio of  $40\text{g L}^{-1}$ , an acid concentration of  $1\text{ M H}_2\text{SO}_4$ , a working voltage of  $1.2\text{ V}$ , a reaction temperature of  $40\text{ }^\circ\text{C}$ , and a leaching time of  $1\text{ h}$ .

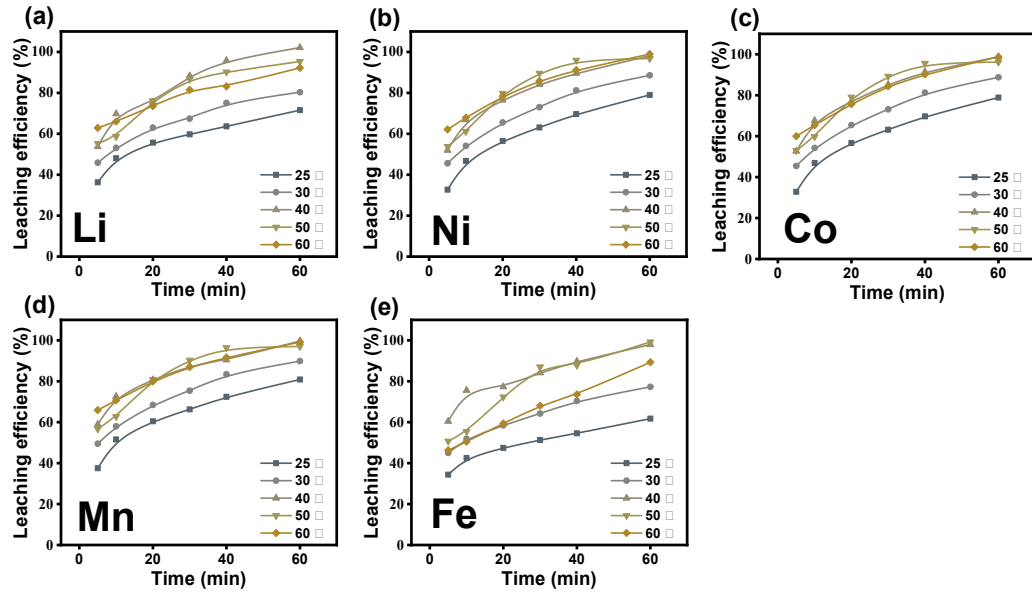

Figure S3 Kinetic data curve for leaching of (a) Li, (b) Ni, (c) Co, (d) Mn, (e) Fe, and (f) Al from spent LIBs at 1 M H<sub>2</sub>SO<sub>4</sub>, operating voltage of 1.2 V, temperature of 40 °C, leaching time of 1 h,  $n_{(Fe)}/n_{(Ni+Co+Mn)} = 0.4:1$ , and solid-liquid ratio of 40 g L<sup>-1</sup>.

Table S3 Fitting coefficients of kinetic models of Co, Mn, and Li under different temperature parameters

| Equation            | Temperature (°C)         | Fitting Result              | $R_1^2$                     | Fitting Result of<br>$\ln k = -E_a/RT + A$ | $R_2^2$                       | $E_a$ (kJ mol <sup>-1</sup> ) |          |
|---------------------|--------------------------|-----------------------------|-----------------------------|--------------------------------------------|-------------------------------|-------------------------------|----------|
| Li                  | $y = 1-(1-x)^{1/3}$      | 25                          | $y = 0.002935 x + 0.172007$ | 0.980088                                   | $y = -7.790872 x + 20.317386$ | 0.998603                      | 64.77331 |
|                     |                          | 30                          | $y = 0.004723 x + 0.178968$ | 0.984696                                   |                               |                               |          |
|                     |                          | 40                          | $y = 0.010348 x + 0.196695$ | 0.980328                                   |                               |                               |          |
|                     | $y = 1-(1-x)^{2/3}$      | 25                          | $y = 0.004451 x + 0.318194$ | 0.974946                                   | $y = -5.765635 x + 13.955499$ | 0.991695                      | 47.93549 |
|                     |                          | 30                          | $y = 0.006640 x + 0.337004$ | 0.983417                                   |                               |                               |          |
|                     |                          | 40                          | $y = 0.011412 x + 0.414167$ | 0.974426                                   |                               |                               |          |
| Ni                  | $y = 1-2/3x-(1-x)^{2/3}$ | 25                          | $y = 0.001111 x + 0.023295$ | 0.995937                                   | $y = -9.000998 x + 23.360122$ | 0.997595                      | 74.8343  |
|                     |                          | 30                          | $y = 0.001708 x + 0.025395$ | 0.992023                                   |                               |                               |          |
|                     |                          | 40                          | $y = 0.004658 x + 0.020471$ | 0.993772                                   |                               |                               |          |
|                     | $y = 1-(1-x)^{1/3}$      | 25                          | $y = 0.004279 x + 0.152706$ | 0.996768                                   | $y = -4.179018 x + 8.587993$  | 0.990009                      | 34.74436 |
|                     |                          | 30                          | $y = 0.005751 x + 0.180683$ | 0.989986                                   |                               |                               |          |
|                     |                          | 40                          | $y = 0.008476 x + 0.211659$ | 0.99166                                    |                               |                               |          |
| Co                  | $y = 1-(1-x)^{2/3}$      | 25                          | $y = 0.005985 x + 0.298443$ | 0.989157                                   | $y = -1.773233 x + 0.861590$  | 0.916094                      | 14.74266 |
|                     |                          | 30                          | $y = 0.007169 x + 0.357092$ | 0.973912                                   |                               |                               |          |
|                     |                          | 40                          | $y = 0.008082 x + 0.452514$ | 0.996026                                   |                               |                               |          |
|                     | $y = 1-2/3x-(1-x)^{2/3}$ | 25                          | $y = 0.001857 x + 0.009525$ | 0.994277                                   | $y = -4.815397 x + 9.898800$  | 0.984562                      | 40.03521 |
|                     |                          | 30                          | $y = 0.002659 x + 0.017827$ | 0.996093                                   |                               |                               |          |
|                     |                          | 40                          | $y = 0.004096 x + 0.025319$ | 0.994093                                   |                               |                               |          |
| $y = 1-(1-x)^{1/3}$ | 25                       | $y = 0.004241 x + 0.154189$ | 0.996381                    | $y = -4.710381 x + 10.356114$              | 0.994967                      | 39.16211                      |          |
|                     | 30                       | $y = 0.005794 x + 0.180129$ | 0.991311                    |                                            |                               |                               |          |
|                     | 40                       | $y = 0.009127 x + 0.207978$ | 0.994701                    |                                            |                               |                               |          |
| $y = 1-(1-x)^{2/3}$ | 25                       | $y = 0.006707 x + 0.283996$ | 0.993369                    | $y = -1.835003 x + 1.214810$               | 0.747953                      | 15.25621                      |          |
|                     | 30                       | $y = 0.008743 x + 0.323893$ | 0.997116                    |                                            |                               |                               |          |

|    |                          |    |                             |          |                                |          |          |
|----|--------------------------|----|-----------------------------|----------|--------------------------------|----------|----------|
|    |                          | 40 | $y = 0.009288 x + 0.437776$ | 0.999243 |                                |          |          |
|    |                          | 25 | $y = 0.001846 x + 0.009914$ | 0.993745 |                                |          |          |
|    | $y = 1-2/3x-(1-x)^{2/3}$ | 30 | $y = 0.002683 x + 0.017470$ | 0.996572 | $y = -5.224422 x + 11.261685$  | 0.988926 | 43.43584 |
|    |                          | 40 | $y = 0.004342 x + 0.025144$ | 0.99669  |                                |          |          |
|    |                          | 25 | $y = 0.004147 x + 0.178815$ | 0.996702 |                                |          |          |
|    | $y = 1-(1-x)^{1/3}$      | 30 | $y = 0.005711 x + 0.202828$ | 0.987883 | $y = -5.289693 x + 12.267193$  | 0.998865 | 43.97851 |
|    |                          | 40 | $y = 0.009751 x + 0.221614$ | 0.985136 |                                |          |          |
|    |                          | 25 | $y = 0.005620 x + 0.341041$ | 0.989323 |                                |          |          |
| Mn | $y = 1-(1-x)^{2/3}$      | 30 | $y = 0.006884 x + 0.392423$ | 0.996668 | $y = -1.908013 x + 1.256623$   | 0.900655 | 15.86322 |
|    |                          | 40 | $y = 0.007777 x + 0.503904$ | 0.990164 |                                |          |          |
|    |                          | 25 | $y = 0.001785 x + 0.021625$ | 0.999263 |                                |          |          |
|    | $y = 1-2/3x-(1-x)^{2/3}$ | 30 | $y = 0.002720 x + 0.024997$ | 0.993469 | $y = -5.719268 x + 12.895694$  | 0.985956 | 47.54999 |
|    |                          | 40 | $y = 0.004563 x + 0.037436$ | 0.99476  |                                |          |          |
|    |                          | 25 | $y = 0.002078 x + 0.149584$ | 0.998225 |                                |          |          |
|    | $y = 1-(1-x)^{1/3}$      | 30 | $y = 0.003508 x + 0.184461$ | 0.99395  | $y = -8.672584 x + 22.929016$  | 0.998916 | 72.10386 |
|    |                          | 40 | $y = 0.008440 x + 0.209722$ | 0.992145 |                                |          |          |
|    |                          | 25 | $y = 0.003231 x + 0.280803$ | 0.996936 |                                |          |          |
| Fe | $y = 1-(1-x)^{2/3}$      | 30 | $y = 0.004874 x + 0.345755$ | 0.988066 | $y = -4.990753 x + 11.057580$  | 0.969893 | 41.49312 |
|    |                          | 40 | $y = 0.007389 x + 0.482744$ | 0.999602 |                                |          |          |
|    |                          | 25 | $y = 0.000716 x + 0.017776$ | 0.997201 |                                |          |          |
|    | $y = 1-2/3x-(1-x)^{2/3}$ | 30 | $y = 0.001473 x + 0.024959$ | 0.997033 | $y = -10.294137 x + 27.345033$ | 0.990851 | 85.58546 |
|    |                          | 40 | $y = 0.003851 x + 0.034742$ | 0.995552 |                                |          |          |

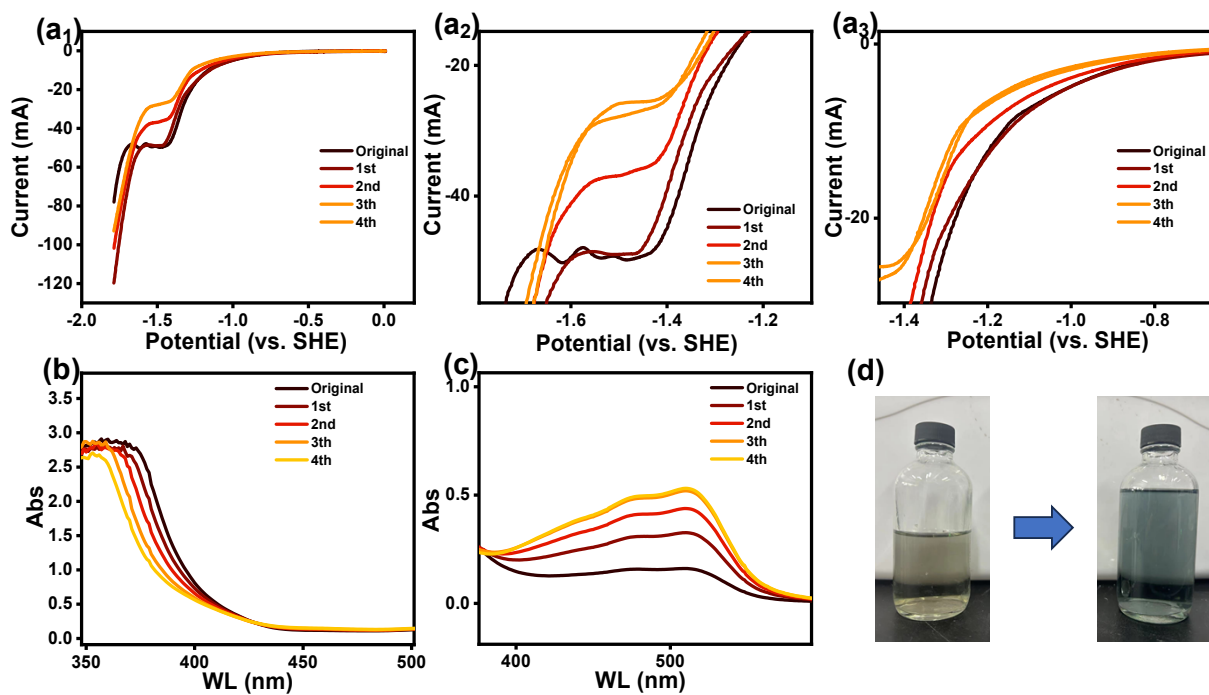

Figure S4 (a) LSV curves of the leachate, (b) UV-Vis tests of the solution under different LSV scan times, (c) UV-Vis tests of the solution after adding o-phenanthroline under different LSV scan times, (d) photos of the solution before and after scanning

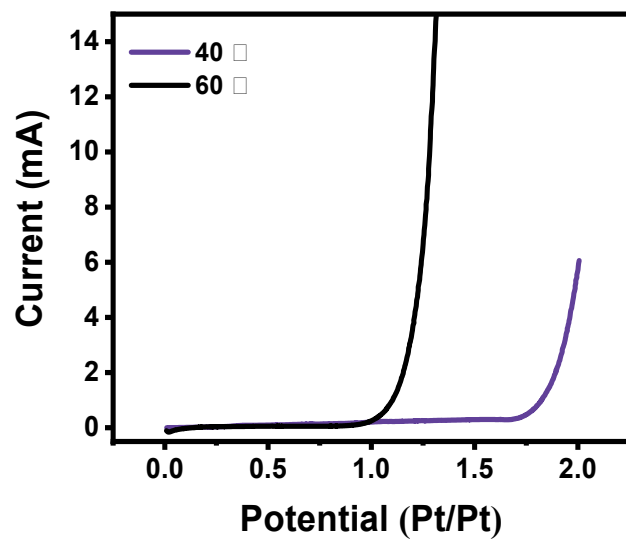

Figure S5 The LSV test results of the Pt/Pt electrode at different temperatures in 1M H<sub>2</sub>SO<sub>4</sub> solution ◦

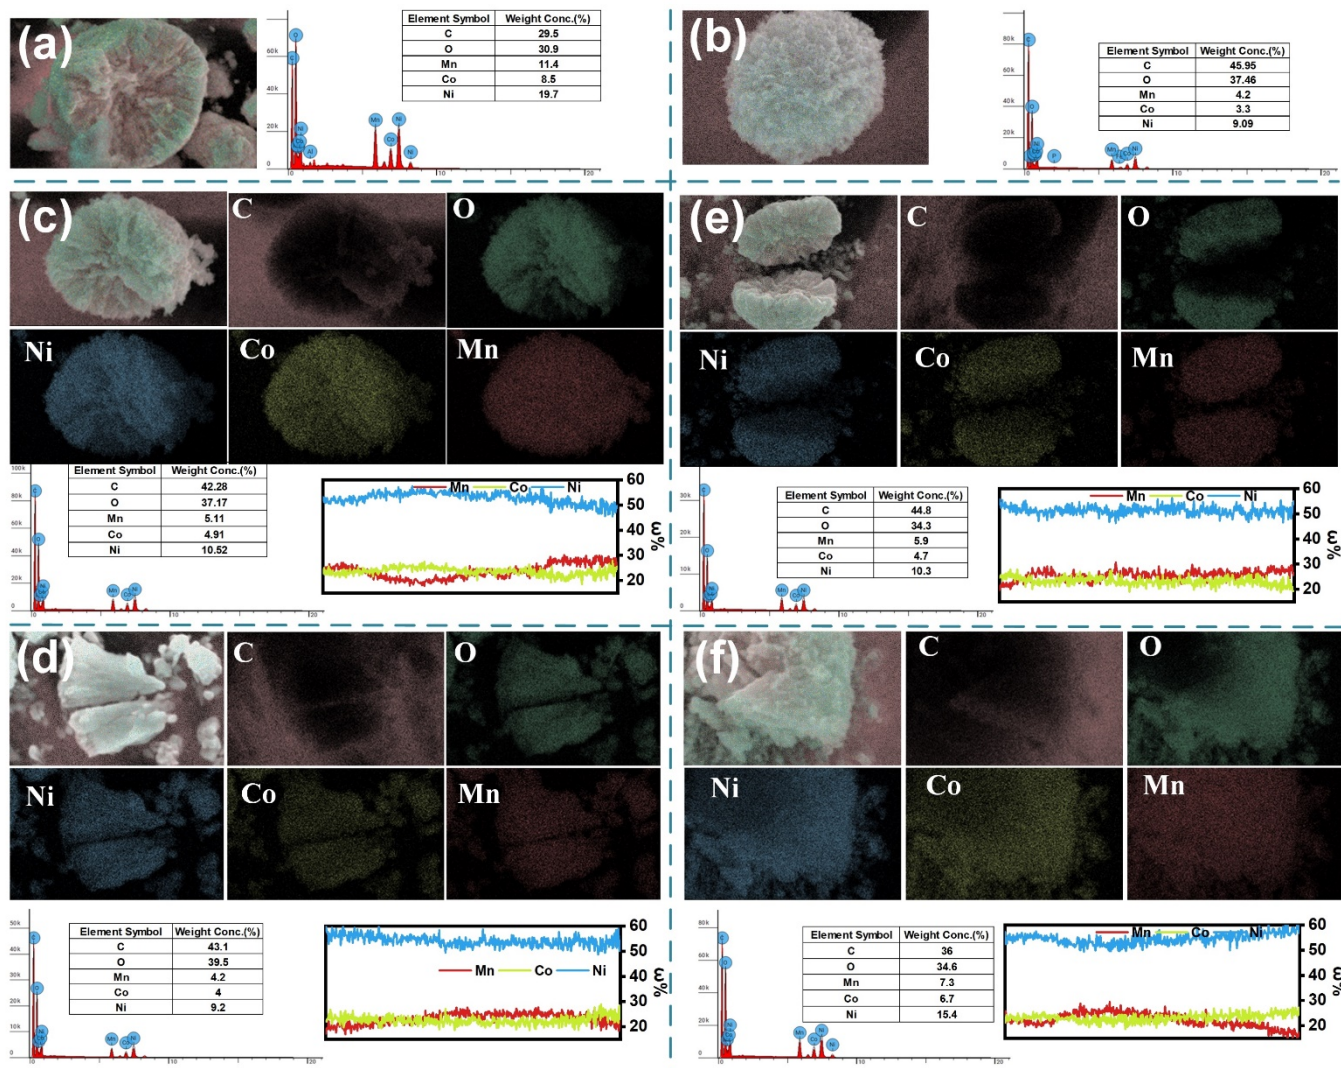

Figure S6 Cross-sectional images of (a) pristine NCM particles, (b) NCM particles after leaching for 10 min under the optimal leaching conditions, and NCM particles after leaching for (c) 10 min and (d) 20 min under the optimal leaching conditions. SEM images, EDS mapping results, and Ni, Co, and Mn line-scan profiles of (e) Group A and (f) Group D after leaching for 10 min.

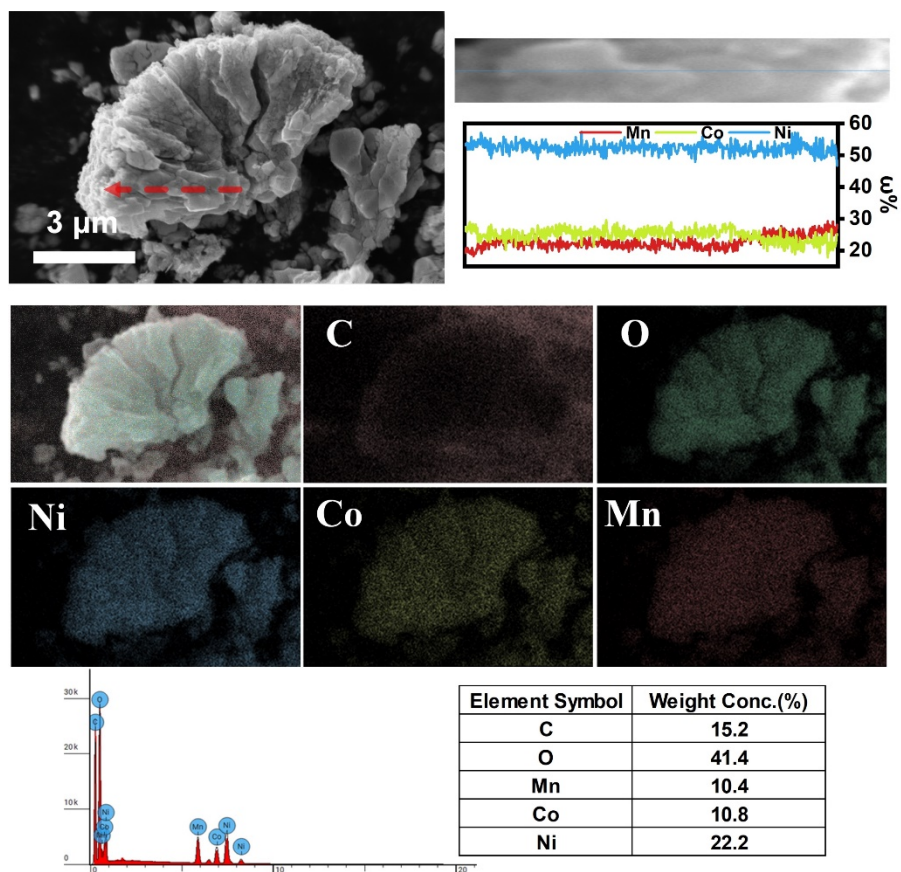

Figure S7 Sectional SEM and EDS linear scanning results of Group F at reaction time 1 h.

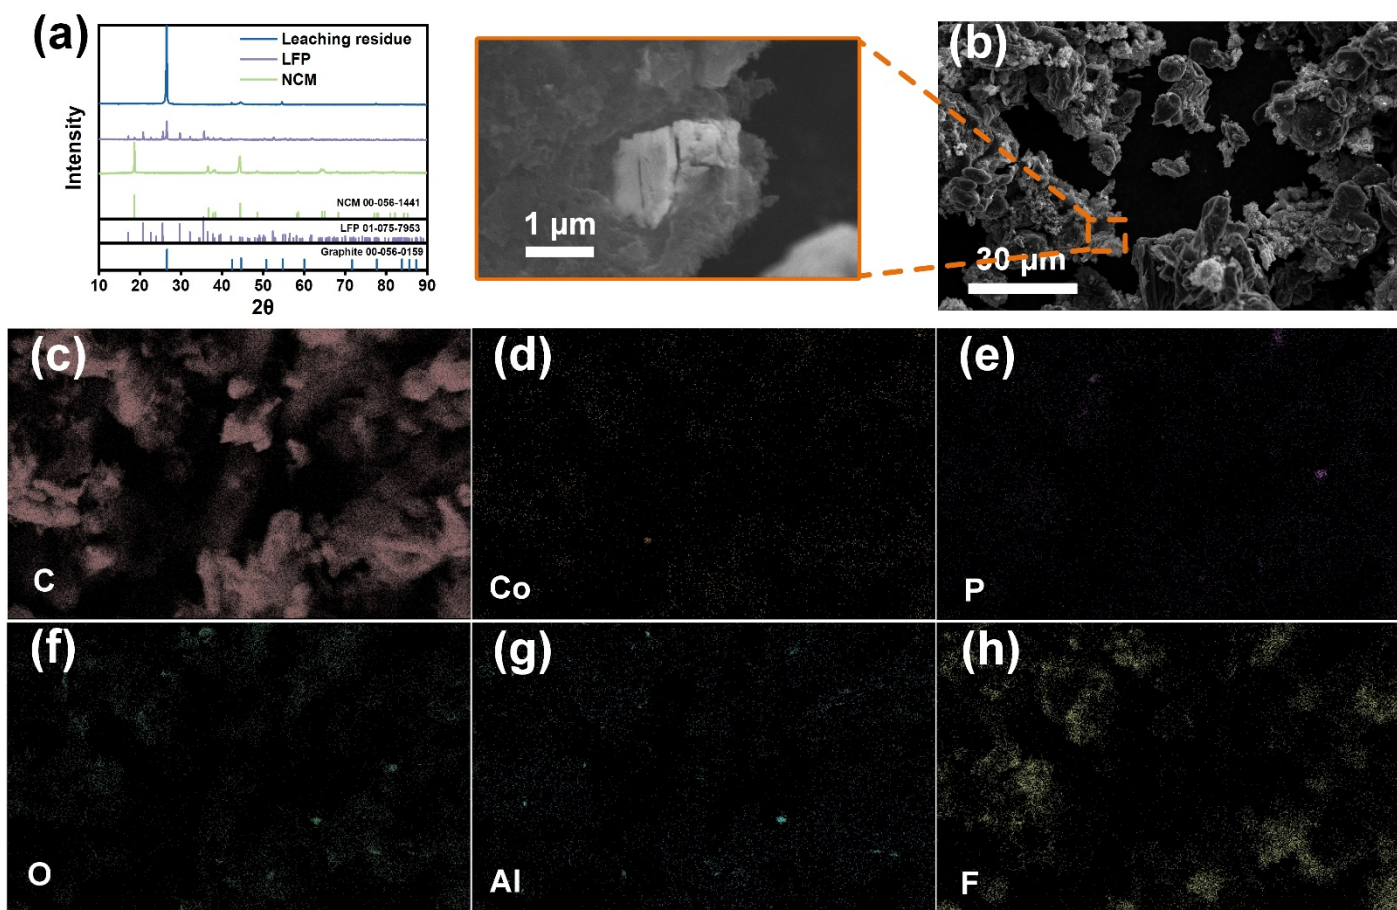

Figure S8 (a) XRD results of raw materials and leaching residue, (b) SEM results of leaching residue and (c-h) EDS results of different elements.

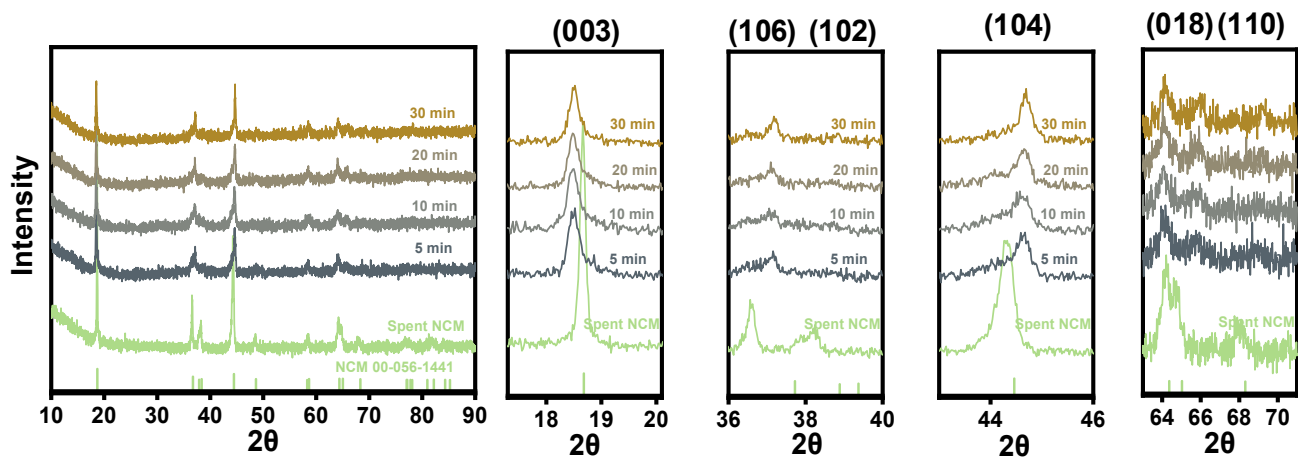

Figure S9 (a) XRD patterns of leaching residues of Group D

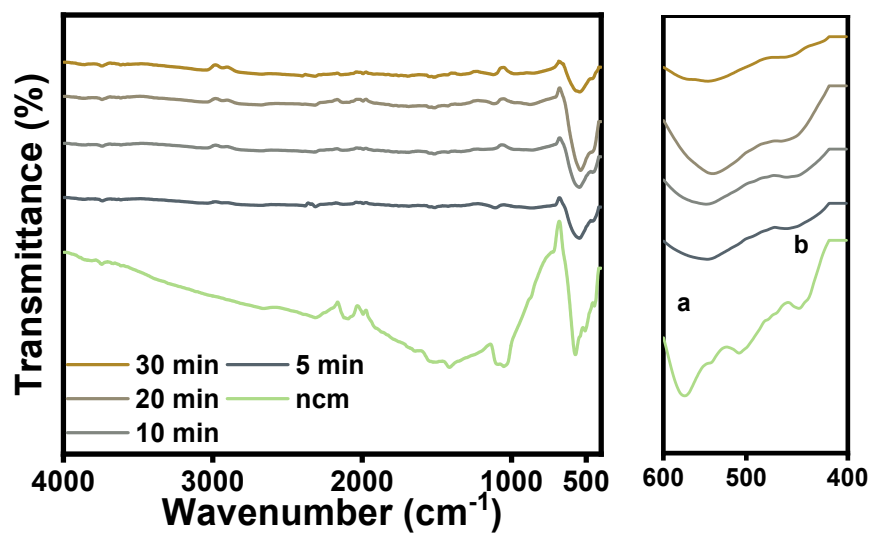

Figure S10 (a) FT-IR patterns of leaching residues after 30 min leaching of Group D.

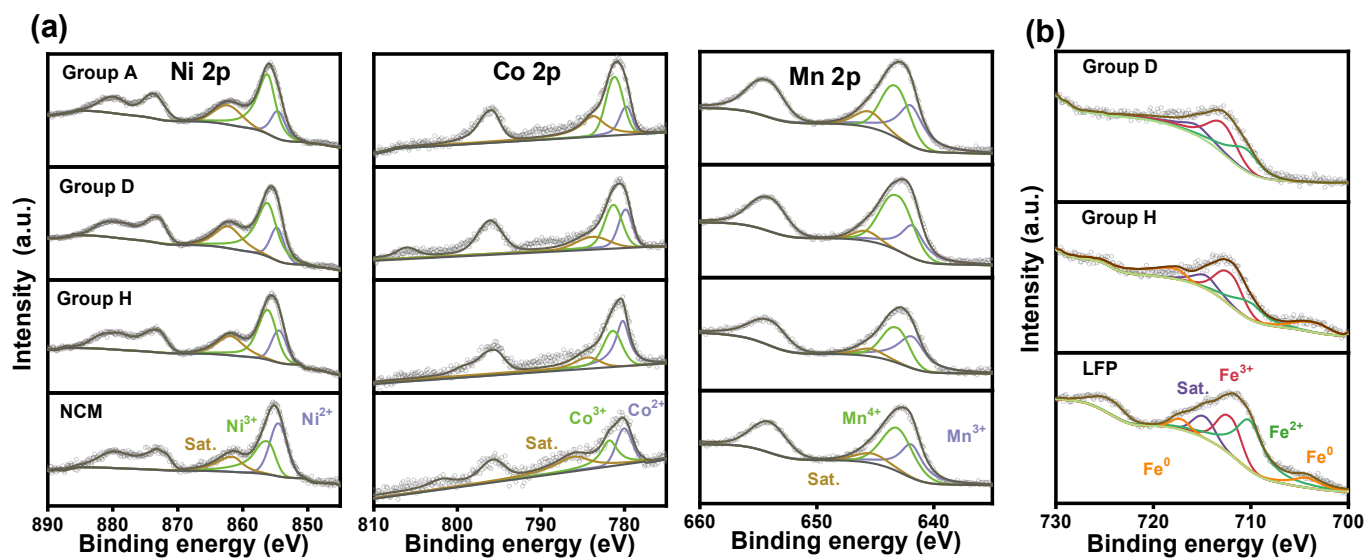

Figure S11 (a) XPS results of Ni, Co and Mn in the leachate residue of NCM and different groups after leaching for 30 min, (b) XPS results of Fe in the leachate residue of LFP and different groups after leaching for 30 min.

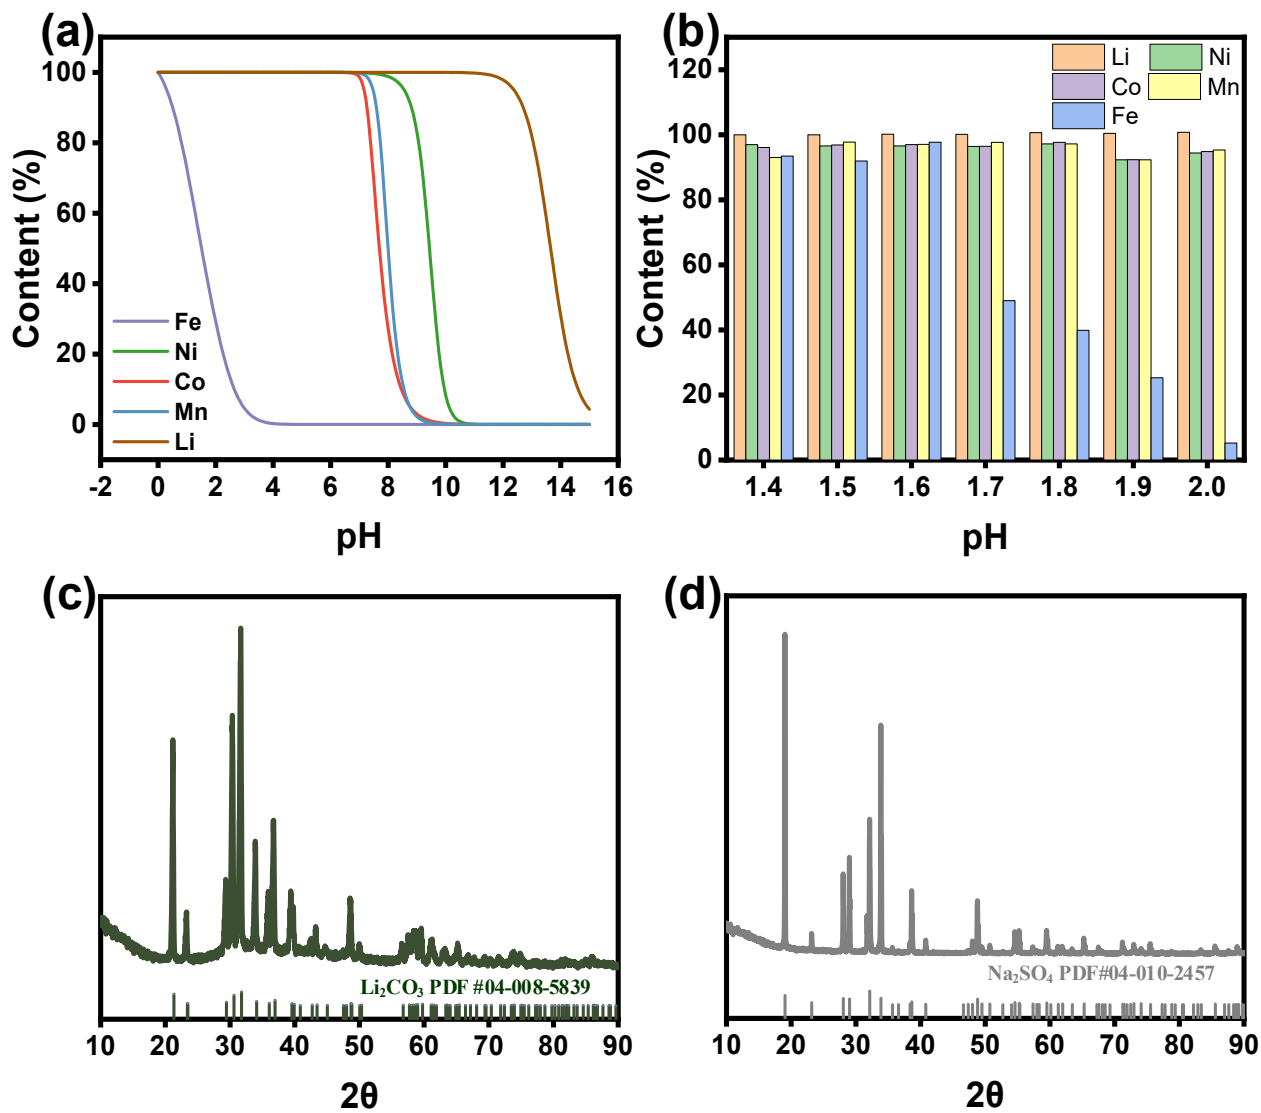

Figure S12 (a) Retention rates of different elements in the leachate at different pH values, (b) Concentration changes of each element in the leachate at different pH values. XRD of (c)  $\text{Li}_2\text{CO}_3$  and (d)  $\text{Na}_2\text{SO}_4$  obtained by precipitation

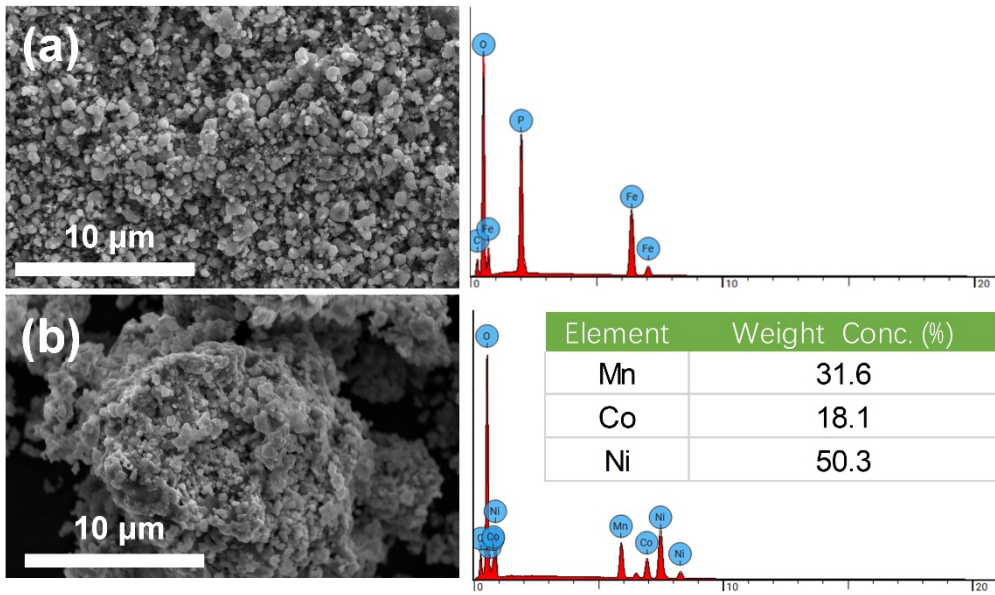

Figure S13 SEM and EDS images of regenerated (a) LFP and (b) NCM;

Table S4 Calculation Process of Economic Analysis

|                           | Substance                                                       | Amount (kg)          | Price (\$/kg)            | Costs (\$) |
|---------------------------|-----------------------------------------------------------------|----------------------|--------------------------|------------|
| Raw materials expenditure | spent NCM                                                       | 0.58                 | 9.36                     | 5.43       |
|                           | spent LFP                                                       | 0.42                 | 1.41                     | 0.59       |
|                           | H <sub>2</sub> SO <sub>4</sub>                                  | 1.357                | 0.1                      | 0.13       |
|                           | NaOH                                                            | 2.04                 | 0.35                     | 0.71       |
|                           | C <sub>2</sub> H <sub>2</sub> O <sub>4</sub> ·2H <sub>2</sub> O | 1.14                 | 0.39                     | 0.44       |
|                           | Na <sub>2</sub> CO <sub>3</sub>                                 | 0.89                 | 0.16                     | 0.15       |
|                           | Li <sub>2</sub> CO <sub>3</sub>                                 | 0.057                | 10.67                    | 0.6        |
|                           | Total                                                           | 8.05                 |                          |            |
|                           | Unit operation                                                  |                      | Power consumption (kW h) | Costs (\$) |
| Energy expenditure        | Suspended electrolysis                                          | Electrolysis         | 0.006                    | 0.21       |
|                           |                                                                 | Heating and stirring | 3                        |            |
|                           |                                                                 | Filtration           | 0.055                    |            |
|                           |                                                                 | Total                | 3.061                    |            |
|                           | Extraction leachate                                             | Stirring             | 0.2                      | 0.02       |
|                           |                                                                 | Filtration           | 0.055                    |            |
|                           |                                                                 | Total                | 0.255                    |            |
|                           | Co-precipitation                                                | Heating and stirring | 3                        | 0.21       |
|                           |                                                                 | Filtration           | 0.055                    |            |
|                           |                                                                 | Total                | 3.055                    |            |
|                           | Chemical precipitation                                          | stirring             | 0.2                      | 0.02       |
|                           |                                                                 | Filtration           | 0.055                    |            |
|                           |                                                                 | Total                | 0.255                    |            |
|                           | Evaporative crystallization                                     | Heating and stirring | 5.6                      | 0.39       |
|                           |                                                                 | Filtration           | 0.055                    |            |
|                           |                                                                 | Total                | 5.655                    |            |
| Oxidizing roasting        | Roasting                                                        | 5.5                  | 0.38                     |            |
| Reducing roasting         | Roasting                                                        | 4.5                  | 0.32                     |            |
| Total                     | 1.55                                                            |                      |                          |            |

|                 | Substance                                           | Amount (kg) | Price (\$/kg) | Price (\$/t) |
|-----------------|-----------------------------------------------------|-------------|---------------|--------------|
| Product         | NCM                                                 | 0.55        | 17.27         | 9.5          |
|                 | LFP                                                 | 0.39        | 4.78          | 1.87         |
|                 | Na <sub>2</sub> SO <sub>4</sub> ·10H <sub>2</sub> O | 8.06        | 0.15          | 1.21         |
|                 | NaOH                                                | 0.33        | 0.35          | 0.12         |
|                 | Total Benefit (\$/kg)                               | 12.70       |               |              |
| Profits (\$/kg) | 3.10                                                |             |               |              |

In this calculation, the prices of raw materials and products are based on the average prices in February 2026, sourced from <https://www.alibaba.com/>.

The electricity fee is calculated at the average electricity price in Shaanxi Province, China, of 0.5 CNY per kW·h, and the RMB to USD exchange rate is set at 1 USD = 7.12 CNY.

The energy consumption during battery production is calculated in accordance with the Hunan Provincial Standard of China *Energy Consumption Quota and Calculation Method for Unit Product of Lithium Battery Cathode Materials (DB43/T1591-2019)*.
